# Supplementary material for: Broadening the versatility of lentiviral vectors as a tool in nucleic acid research via genetic code expansion
Source: PubMed Central journal article supplement — Nucleic Acids Res. 2015 Mar 12;43(11):e73. doi: 10.1093/nar/gkv202 (PMC4477642; doi:10.1093/nar/gkv202), 2015-03-12

Supplementary Data For Publication.

## **Broadening the versatility of lentiviral vectors as a tool in nucleic acid research via genetic code expansion**

Yongxiang Zheng<sup>1</sup>, Fei Yu<sup>1</sup>, Yiming Wu<sup>1</sup>, Longlong Si<sup>1</sup>, Huan Xu<sup>1</sup>, Chuanling Zhang<sup>1</sup>, Qing Xia<sup>1</sup>, Sulong Xiao<sup>1</sup>, Qi Wang<sup>1,2</sup>, Qiuchen He<sup>1</sup>, Peng Chen<sup>3</sup>, Jiangyun Wang<sup>4</sup>, Lihe Zhang<sup>1</sup>, Kazunari Taira<sup>1</sup> and Demin Zhou<sup>1\*</sup>

<sup>1</sup>State Key Laboratory of Natural and Biomimetic Drugs, School of Pharmaceutical Sciences, Peking University, Beijing 100191, China

<sup>2</sup>Department of Molecular and Cellular Pharmacology, School of Pharmaceutical Sciences, Peking University, Beijing 100191, China

<sup>3</sup>Department of Chemical Biology, College of Chemistry and Molecular Engineering, Peking University, Beijing 100871, China

<sup>4</sup>Institute of Biophysics, Chinese Academy of Sciences, Beijing 100101, China

\* To Demin Zhou correspondence should be addressed. Tel: 86-10-8280-5857; Fax: 86-10-8280-5857 ; Email: [deminzhou@bjmu.edu.cn](mailto:deminzhou@bjmu.edu.cn)

Present Address: [Demin Zhou], School of Pharmaceutical Sciences, Peking University, Beijing, 100191, China.

### **CONTENT**

**Supplementary Movie S1**

**Supplementary Table S1**

**Supplementary Figure S1-8**

**Supplementary Movie S1.** Dynamic Tracking of an Alexa 488 labeled lentiviral vector in three dimensions. Lentiviral vectors were conjugated with Alexa 488 (green) via NAEK and then detected at 488 nm. The cell membrane was stained with Dil (red) and detected with 555-nm laser. The process of viral particles traveling from the cell membrane to the endoplasm was recorded using a spinning-disk confocal microscope equipped with a CO<sub>2</sub> online culture system (Perkin Elmer).

## Supplementary Tables and Figures

**Table S1.** The primers for mutagenesis. The sequence of pCMV-VSVg plasmid is available at <http://www.ncbi.nlm.nih.gov/nucleotide/AJ318514.1>.

| Mutation Site | Primer   | Sequence                                      |
|---------------|----------|-----------------------------------------------|
| N20           | Forward  | CTGGAAAAATGTTCTTCTTAGTACCATTATTGCCCGTCAAGC    |
| N20           | Rearward | GCTTGACGGGCAATAATGGTACTAAGAAGGAACATTTTTCCAG   |
| D35           | Forward  | GCTCAGATTAAATTGGCATAATTAGTTAATAGGCACAGC       |
| D35           | Rearward | GCTGTGCCTATTAATAATTATGCCAATTTAAATCTGAGC       |
| I37           | Forward  | CAGATTTAAATTGGCATAATGACTTATAGGGCACAGCCTTACAAG |
| I37           | Rearward | CTTGTAAGGCTGTGCCCTATAAGTCATTATGCCAATTTAAATCTG |
| Q42           | Forward  | GACTTAATAGGCACAGCCTTA TAG GTCAAAATGCCCAAGAG   |
| Q42           | Rearward | CTCTTGGGCATTTTGACCTATAAGGCTGTGCCTATTAAGTC     |
| Y116          | Forward  | CTTCCCTCCTCAAAGTTGTGGATAGGCAACTGTGACGGATGCC   |
| Y116          | Rearward | GGCATCCGTCACA GTTGCCTATCCACA ACTTTGAGGAGGGAAG |
| D121          | Forward  | GTGGATATGCAACTGTGACGTAGGCCGAAGCAGTGATTGTCCAG  |
| D121          | Rearward | CTGGACAATCACTGCTTCGGCCTACGTCACAGTTGCATATCCAC  |
| V161          | Forward  | GCAGCAATTACATATGCCCCACTTAGCATAACTCTACAACCTGG  |
| V161          | Rearward | CCAGGTTGTAGAGTTATGCTAAGTGGGGCATATGTAATTGCTGC  |
| K172          | Forward  | CCTGGCATTCTGACTATTAGGTCAAAGGGCTATGTGATTC      |
| K172          | Rearward | GAATCACATAGCCCCTTTGACCTAATAGTCAGAATGCCAGG     |
| K174          | Forward  | CAACCTGGCATTCTGACTATAAGGTCTAGGGGCTATGTGATTC   |
| K174          | Rearward | GAATCACATAGCCCCTAGACCTTATAGTCAGAATGCCAGGTTG   |
| D185          | Forward  | CTAACCTCATTTCATGTAGATCACCTTCTTCTCAGAGGAC      |
| D185          | Rearward | GTCCTCTGAGAAGAAGGTGATCTACATGGAAATGAGGTTAG     |
| D192          | Forward  | CACCTTCTTCTCAGAGTAGGGAGAGCTATCATCC            |
| D192          | Rearward | GGATGATAGCTCTCCCTACTCTGAGAAGAAGGTG            |
| K200          | Forward  | GAGCTATCATCCCTGGGATAGGAGGGCACAGG              |
| K200          | Rearward | CCTGTGCCCTCCTATCCAGGGATGATAGCTC               |
| E201          | Forward  | CATCCCTGGGAAAGTAGGGCACAGGGTTCAG               |
| E201          | Rearward | CTGAACCCTGTGCCCTACTTTCCAGGGATG                |

|      |          |                                                |
|------|----------|------------------------------------------------|
| K225 | Forward  | CAAAATGCAATACTGCTAGCATTGGGGAGTCAGAC            |
| K225 | Rearward | GTCTGACTCCCCAATGCTAGCAGTATTGCATTTTG            |
| A240 | Forward  | GTCTGGTTGAGATGTAGGATAAGGATCTCTTTGC             |
| A240 | Rearward | GCAAAGAGATCCTTATCCTACATCTCGAACCAGAC            |
| K242 | Forward  | CTGCAAAATGCAATACTGCTAGCATTGGGGAGTCAGAC         |
| K242 | Rearward | GTCTGACTCCCCAATGCTAGCAGTATTGCATTTTGCAG         |
| D243 | Forward  | GGTTCGAGATGGCTGATAAGTAGCTCTTTGCTGCAG           |
| D243 | Rearward | CTGCAGCAAAGAGCTACTTATCAGCCATCTCGAACC           |
| A246 | Forward  | GGCTGATAAGGATCTCTTTTAGGCAGCCAGATTCC            |
| A246 | Rearward | GGAATCTGGCTGCCTAAAAGAGATCCTTATCAGCC            |
| A247 | Forward  | CTGATAAGGATCTCTTTGCTTAGGCCAGATTCCCTGAATG       |
| A247 | Rearward | CATTGAGGGAATCTGGCCTAAGCAAAGAGATCCTTATCAG       |
| R249 | Forward  | GGATCTCTTTGCTGCAGCCTAGTTCCCTGAATGCCCAGAAGG     |
| R249 | Rearward | CCTTCTGGGCATTGAGGGAAGTAGGCTGCAGCAAAGAGATCC     |
| E252 | Forward  | CTGCAGCCAGATTCCCTTAGTGCCCAGAAGGGTCAAG          |
| E252 | Rearward | CTTGACCTTCTGGGCACTAAGGGAATCTGGCTGCAG           |
| Y281 | Forward  | GAGAGGATCTTGGATTAGTCCCTCTGCCAAGAAACC           |
| Y281 | Rearward | GGTTTCTTGGCAGAGGGACTAATCCAAGATCCTCTC           |
| W288 | Forward  | CTCTGCCAAGAAACCTAGAGCAAATCAGAGCG               |
| W288 | Rearward | CGCTCTGATTTTGCTCTAGGTTTCTTGGCAGAG              |
| G321 | Forward  | GAACCGGTCCTGCTTTCACCATAATCAATTAGACCCTAAAATAC   |
| G321 | Rearward | GTATTTTAGGGTCTAATTGATTATGGTGAAAGCAGGACCGGTTTC  |
| R332 | Forward  | CTTTGAGACCAGATACATCTAGGTCGATATTGCTGCTCCAATCC   |
| R332 | Rearward | GGATTGGAGCAGCAATATCGACCTAGATGTATCTGGTCTCAAAG   |
| I339 | Forward  | CAGAGTCGATATTGCTGCTCCATAGCTCTCAAGAATGGTCGG     |
| I339 | Rearward | CCGACCATTCTTGAGAGCTATGGAGCAGCAATATCGACTCTG     |
| R342 | Forward  | GACCAGATACATCAGAGTCTAGATTGCTGCTCCAATCCTCTC     |
| R342 | Rearward | GAGAGGATTGGAGCAGCAATCTAGACTCTGATGTATCTGGTC     |
| G345 | Forward  | CCAATCCTCTCAAGAATGGTCTAGATGATCAGTGGAACCTACCAC  |
| G345 | Rearward | GTGGTAGTTCCACTGATCATCTAGACCATTCTTGAGAGGATTGG   |
| M346 | Forward  | CAATCCTCTCAAGAATGGTCGGATAGATCAGTGGAACCTACCACAG |
| M346 | Rearward | CTGTGGTAGTTCCACTGATCTATCCGACCATTCTTGAGAGGATTG  |
| P362 | Forward  | GGGATGACTGGGCATAGTATGAAGACGTGGAAATTGGACC       |
| P362 | Rearward | GGTCCAATTTCCACGTCTTCATACTATGCCCAGTCATCCC       |

**Supplementary Figure S1.** Characterizations of unnatural amino acids NAEK and DiZPK synthesized in lab by high resolution mass spectrometry.

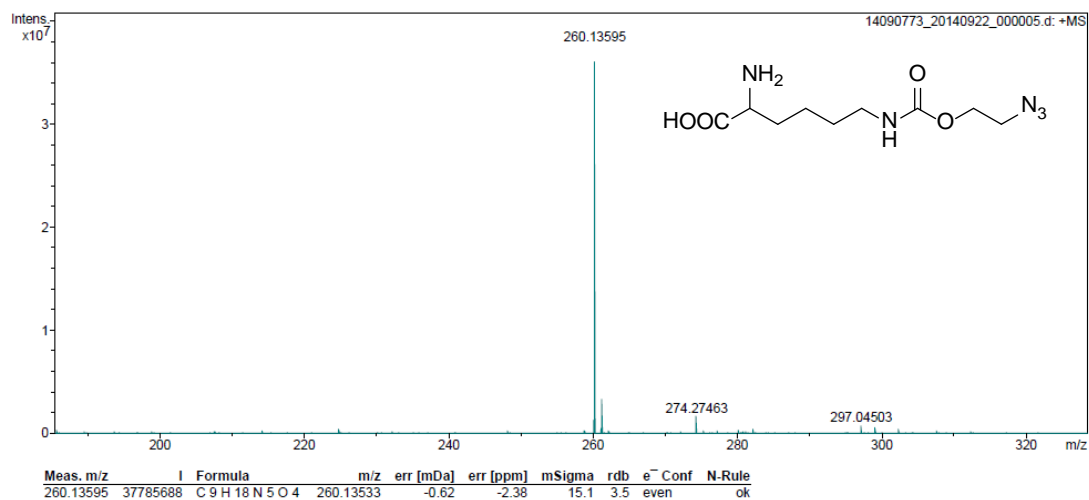

### HIGH RESOLUTION MASS SPECTROMETRY REPORT

| Sample No. | Measured Mass | Exact Mass | Error (m/z) | Error (ppm) | Description |
|------------|---------------|------------|-------------|-------------|-------------|
| Y-1-UA     | 308.16937     | 308.16931  | 0.00006     | 0.19470     |             |

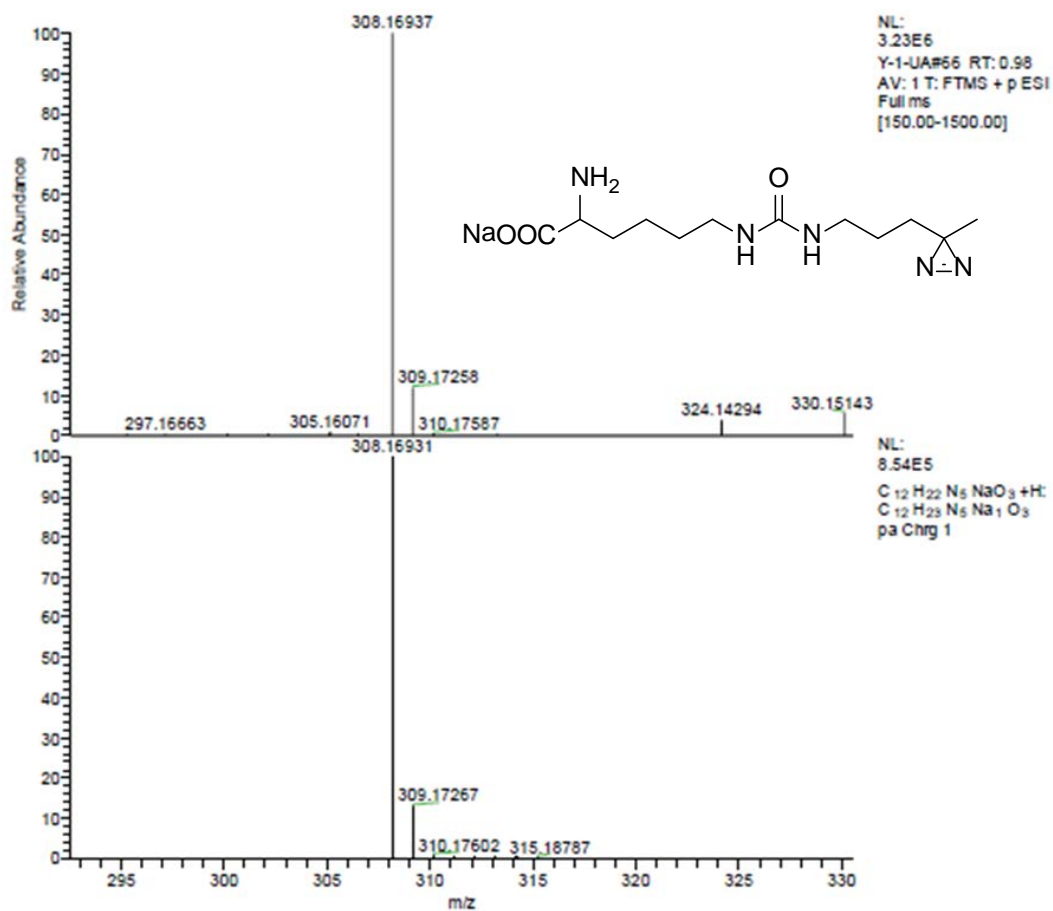

**Supplementary Figure S2.** Systematic exploitation of genetic code expansion-mediated unnatural amino acid incorporation into lentiviral envelope protein at different sites. (A) The expression level of VSVG was analyzed by SDS-PAGE and detected by western blotting using mouse monoclonal anti-VSVg (Sigma Aldrich). (B) The expression level of GAPDH was analyzed by SDS-PAGE and detected by western blotting using rabbit monoclonal anti-GAPDH as loading controls.

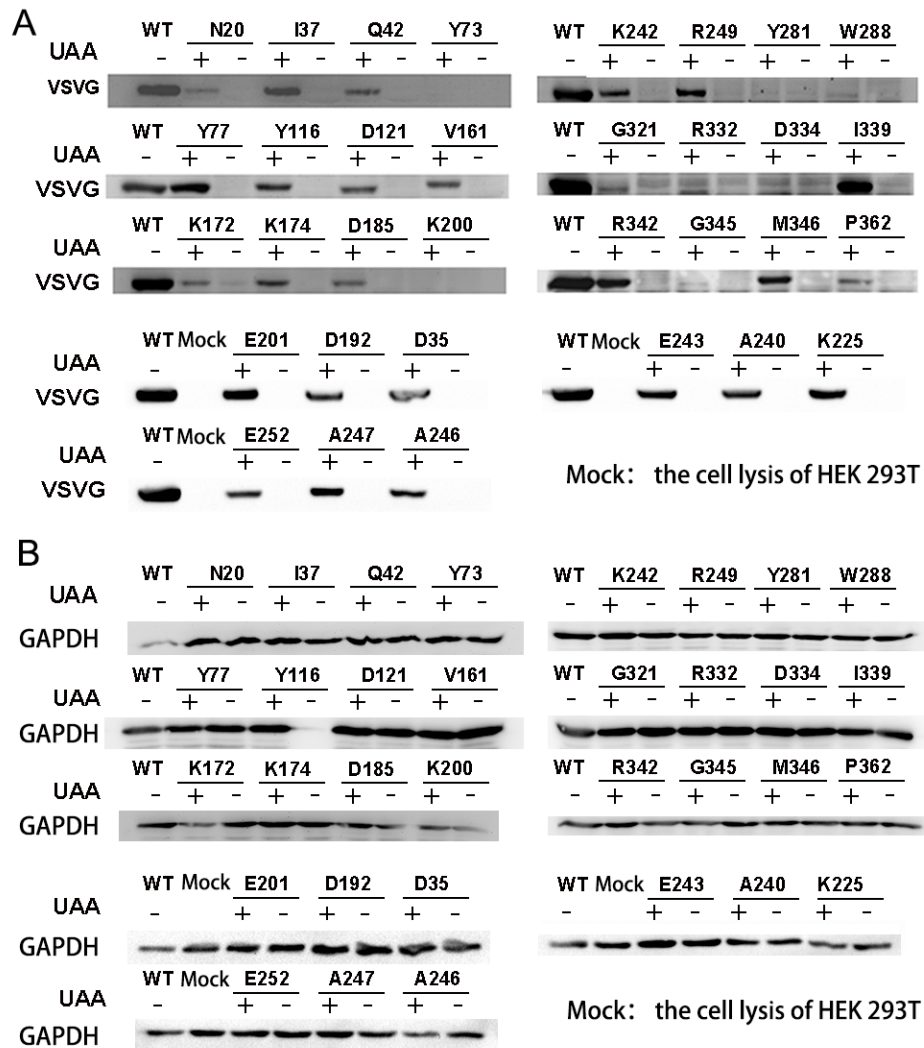

**Supplementary Figure S3.** LC-MS/MS peptide sequencing of VSVg protein. VSVg proteins with or without NAEK incorporated at different positions were purified by immunoprecipitation (IP), analyzed by SDS-PAGE and visualised with Coomassie blue staining. The corresponding protein bands were sliced and analyzed with LC-MS/MS. **(A)** The partial peptide sequencing of the wide type VSVg protein with each mass peak denoted by the corresponding residue. **(B)** The peptide sequencing of NAEK-containing VSVg protein conjugated with Alexa 488; each mass peak was denoted by the corresponding residue including the incorporated NAEK labeled as i\*. As it was confirmed that NAEK was incorporated at I339, the mass difference [ $y_5 - y_3 - m(\text{pro}) - m(\text{NAEK}) = 1549.5511 - 375.2350 - 97.12 - 241.12 = 836.0761$ ] indicated the conjugation of DIBO- Alexa 488 to NAEK.

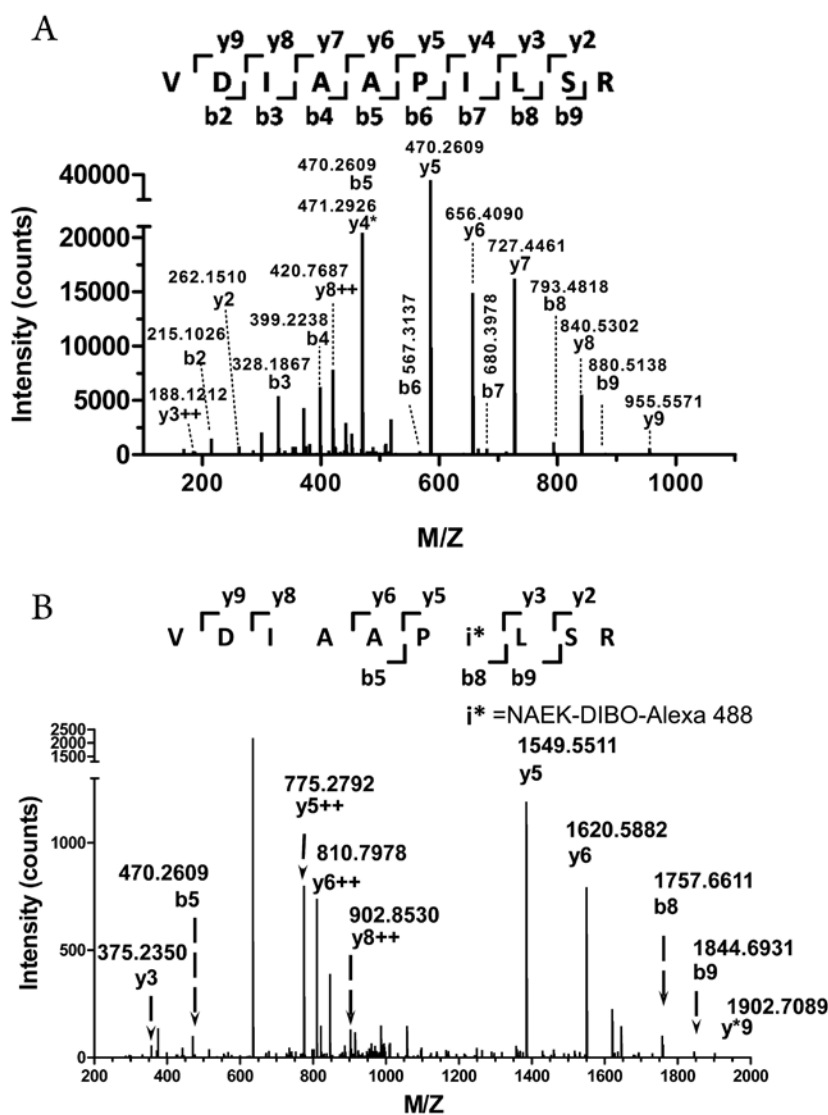

**Supplementary Figure S4.** Development of a NAEK-containing lentiviral vector as a tool for single-virus tracking. Monitoring (A) and quantitative analysis (B) of the viral motility of different single viruses in different pathways within the infected cell.

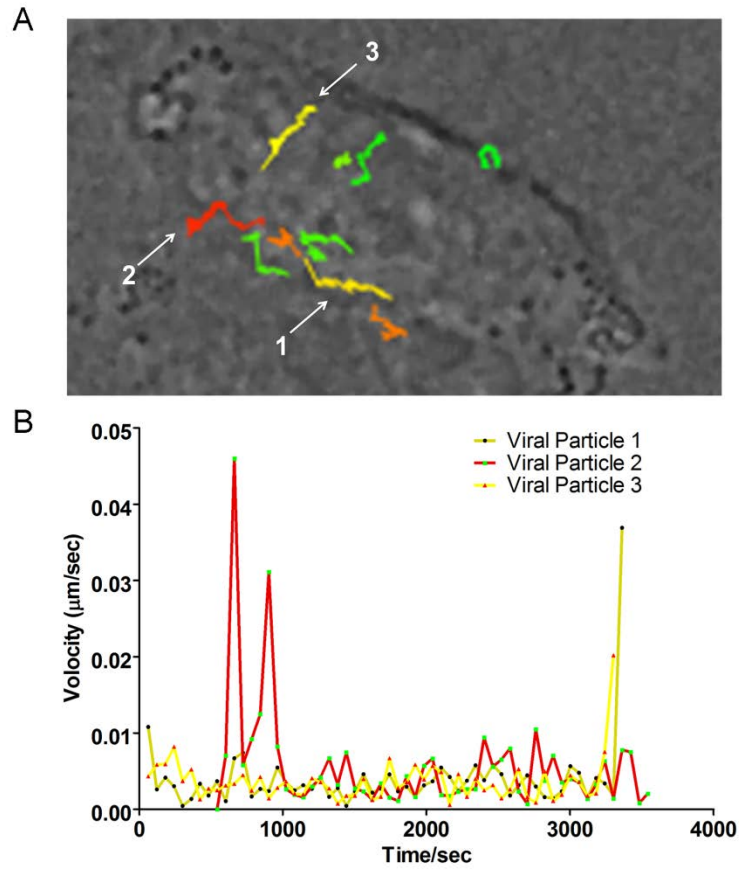

**Supplementary Figure S5.** Structural representatives of DIBO-RGD and DIBO-RAD used in this study.

**c(RGDfK(PEG-PEG))**

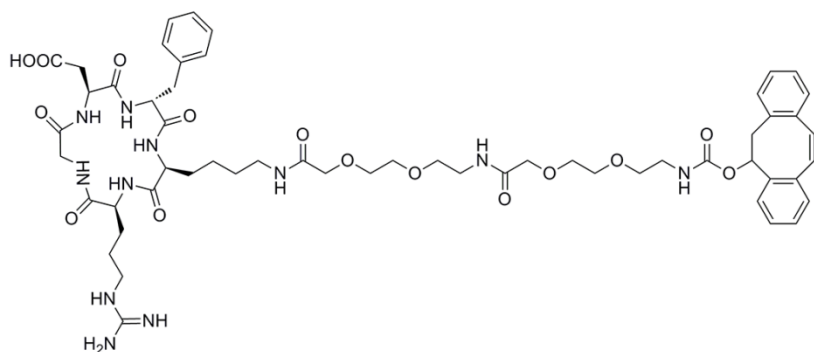

Chemical Formula: C<sub>56</sub>H<sub>73</sub>N<sub>11</sub>O<sub>15</sub>

**c(RADfK(PEG-PEG))**

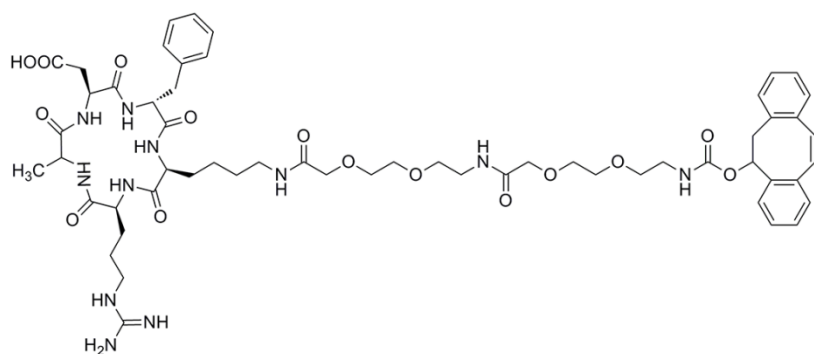

Chemical Formula: C<sub>57</sub>H<sub>75</sub>N<sub>11</sub>O<sub>15</sub>

**Supplementary Figure S6.** RGD conjugation to lentiviral vectors enhances the lentiviral vector tropism. (A) Characterization of the enhanced infectivity in U87 cell upon RGD conjugation of lentiviral vectors at different sites, analyzed by one-way ANOVA test (\* $P < 0.05$ , \*\*\*  $P < 0.001$ ). (B) The RGD-conjugated lentiviral vector, which used green fluorescent protein (GFP) as reporter gene, was much more efficient than the corresponding RAD-conjugated vector in the delivery of these genes into U87 cells (\*\*  $P < 0.01$  ).

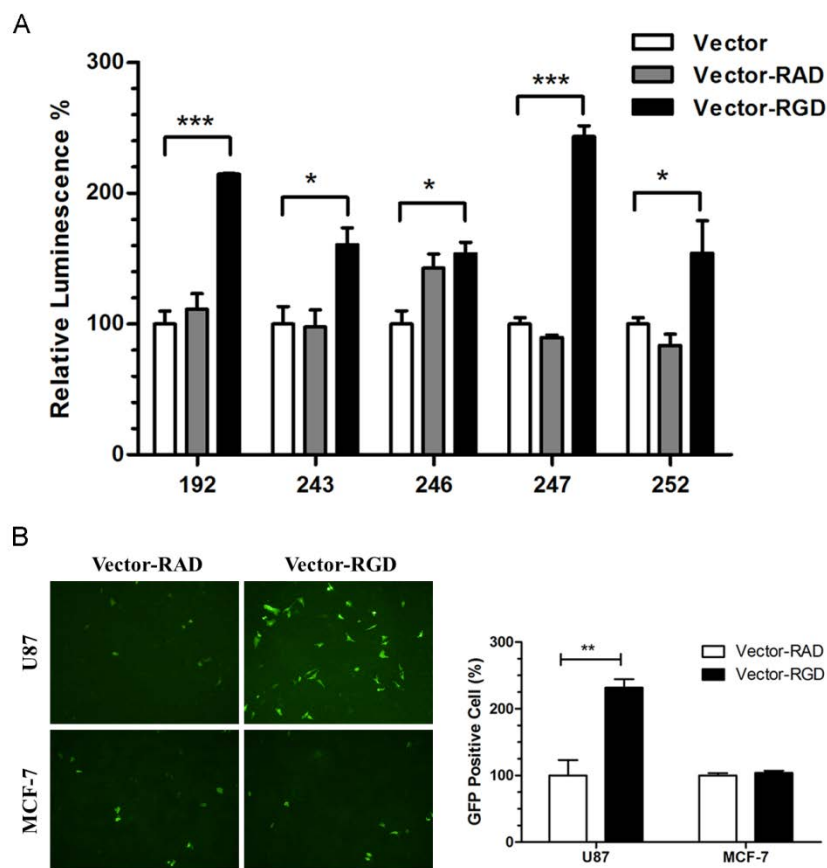

**Supplementary Figure S7.** Site-specific PEGylation of the azide-containing lentiviral vector.

(A) Conjugation of DIBO-5K PEG with the azide-containing lentiviral vector at site 246, while the wild type lentiviral vector as a control. The VSVg protein was analyzed by 9% Gel and detected by western blotting. (B) The time-dependent conjugation of DIBO-5K PEG with the azide-containing lentiviral vector; Conjugation occurred within 2 h. (C) Conjugation of the azide-containing lentiviral vector with different sized PEG moieties; the conjugated products were analyzed by western blotting.

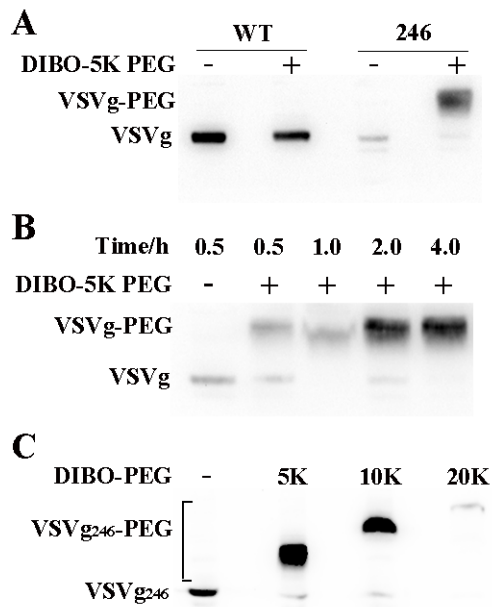

**Supplementary Figure S8.** Display of DiZPK on lentiviral vector for detection of virus-host interactions. (A) Schematic representative of DiZPK-mediated conversion of physical protein-protein interaction to covalently bound protein complex via photo-crossing activation. (B) DiZPK-dependent expression of VSVg protein analyzed by western blotting using monoclonal anti-VSVg. The coding gene bears an amber codon at position Y77 or Y116. GAPDH acts as a loading control. (C) Comparisons of the effect of displaying DiZPK at site Y77 and Y116 on propagation and infectivity of lentiviral vectors, which was detected based on the luciferase assay. (D) Two undetermined cellular factors captured by DiZPK-bearing lentiviral vectors, which was analyzed by western blotting.

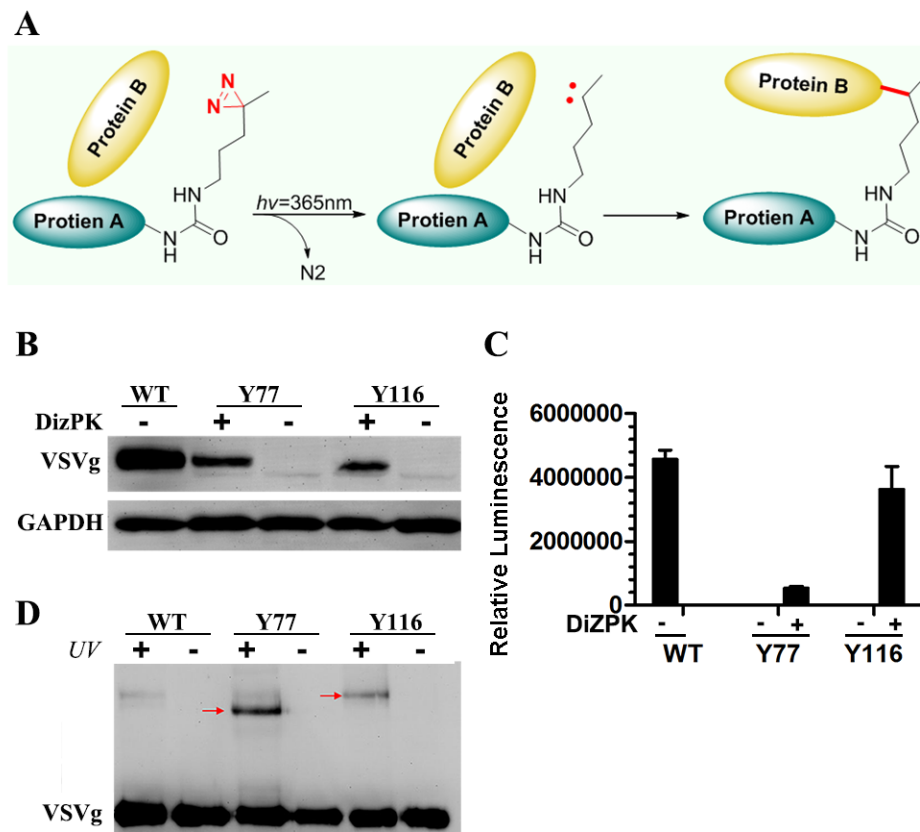

Supplement: supp_gkv202_nar-01799-met-g-2014-File008.pdf [file supp_gkv202_nar-01799-met-g-2014-File008.pdf]
